# Supplementary material for: Dihydrotanshinone I Enhances Cell Adhesion and Inhibits Cell Migration in Osteosarcoma U−2 OS Cells through CD44 and Chemokine Signaling
Source: MDPI journal article supplement (doi:10.3390/molecules27123714), 2022-06-09
Supplement: s1 [file s1]

# Dihydrotanshinone I enhances cell adhesion and inhibits cell migration in osteosarcoma U-2 OS cell through CD44 and chemokine signaling

Lanyan Fan<sup>1,2</sup>, Chen Peng<sup>2</sup>, Xiaoping Zhu<sup>1,2</sup>, Yawen Liang<sup>2</sup>, Tianyi Xu<sup>2</sup>, Peng Xu<sup>1</sup> and Shihua Wu<sup>1,2\*</sup>

<sup>1</sup> Joint Research Centre for Engineering Biology, Zhejiang University-University of Edinburgh Institute, Zhejiang University, Haining 314400, China

<sup>2</sup> Research Center of Siyuan Natural Pharmacy and Biototoxicology, College of Life Sciences, Zhejiang University, Hangzhou, Zhejiang Province 310058, China

\* Correspondence: Drwushihua@zju.edu.cn, Shihuawu@intl.zju.edu.cn; Tel.: +86-13968131541

## Legends for Supplementary figures

**Figure S1.** The chemical structures of major tanshinones isolated from *Salvia miltiorrhiza* rhizome.

**Figure S2.** The effects of DS-1 on HeLa cell adhesion on cell culture plates against trypsin digestion. (A) HeLa cells were seeded at 80000 per well in 6-well plates for 12 h, then treated with 0, 10.0, 15.0, 20.0  $\mu$ M DS-1 for 24 h. After that, cells were washed by PBS solution and digested by 400  $\mu$ L 0.25% trypsin. During the digestion, cellular morphology was recorded by inverted microscope with camera every 30 seconds. The digestion time was shown in Figure (B).

**Figure S3.** The effects of DS-1 on NRK-49F cell adhesion on cell culture plates against trypsin digestion. (A) NRK-49F cells were seeded at 80000 per well in 6-well plate for 12 h, then treated with 0, 6.25, 12.5  $\mu$ M DS-1 for 24 h. After that, cells were washed by PBS solution and digested by 400  $\mu$ L 0.25% trypsin. During the digestion, cellular morphology was recorded by inverted microscope every 30 seconds. The digestion time was shown in Figure (B).

**Figure S4.** CD44 knockdown by siRNA. (A) U-2 OS cells were cultured in the 6-well plate, then CD44 was knocked down by siRNA for 24 h and 36 h. The relative expression of CD44 was detected by Western Blot and shown in Figure (B).

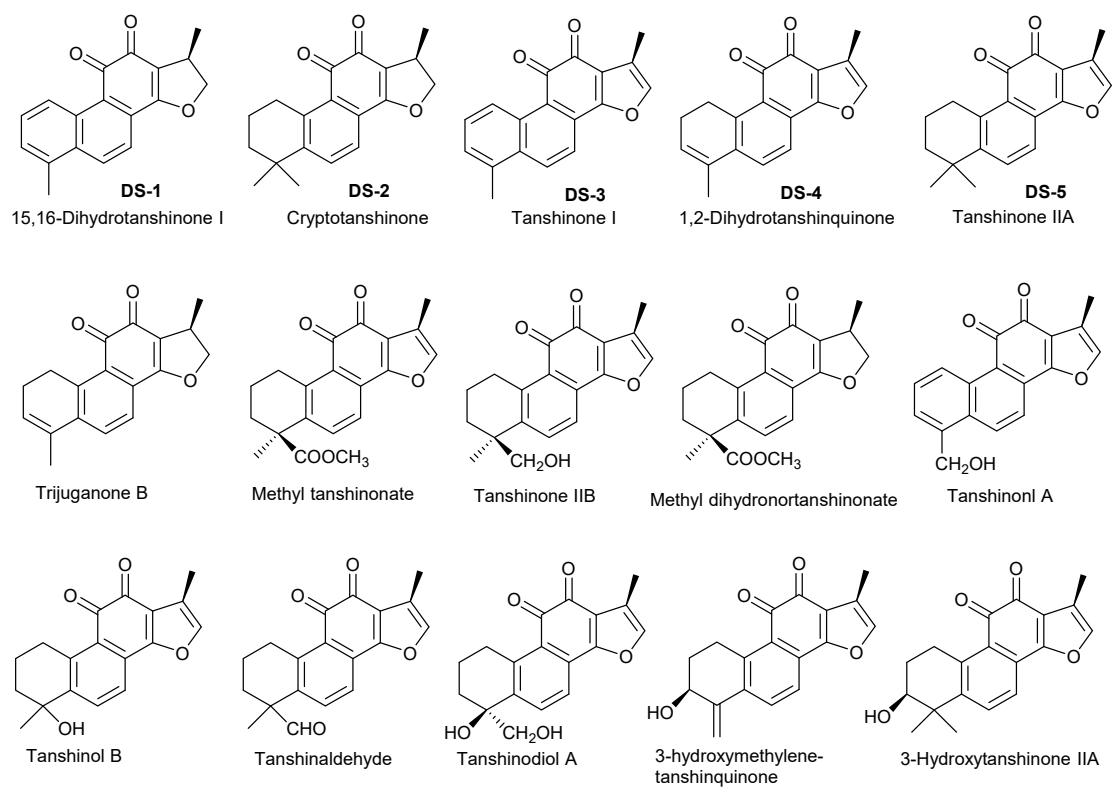

**Figure S1.** The chemical structures of major tanshinones isolated from *Salvia miltiorrhiza* rhizome.

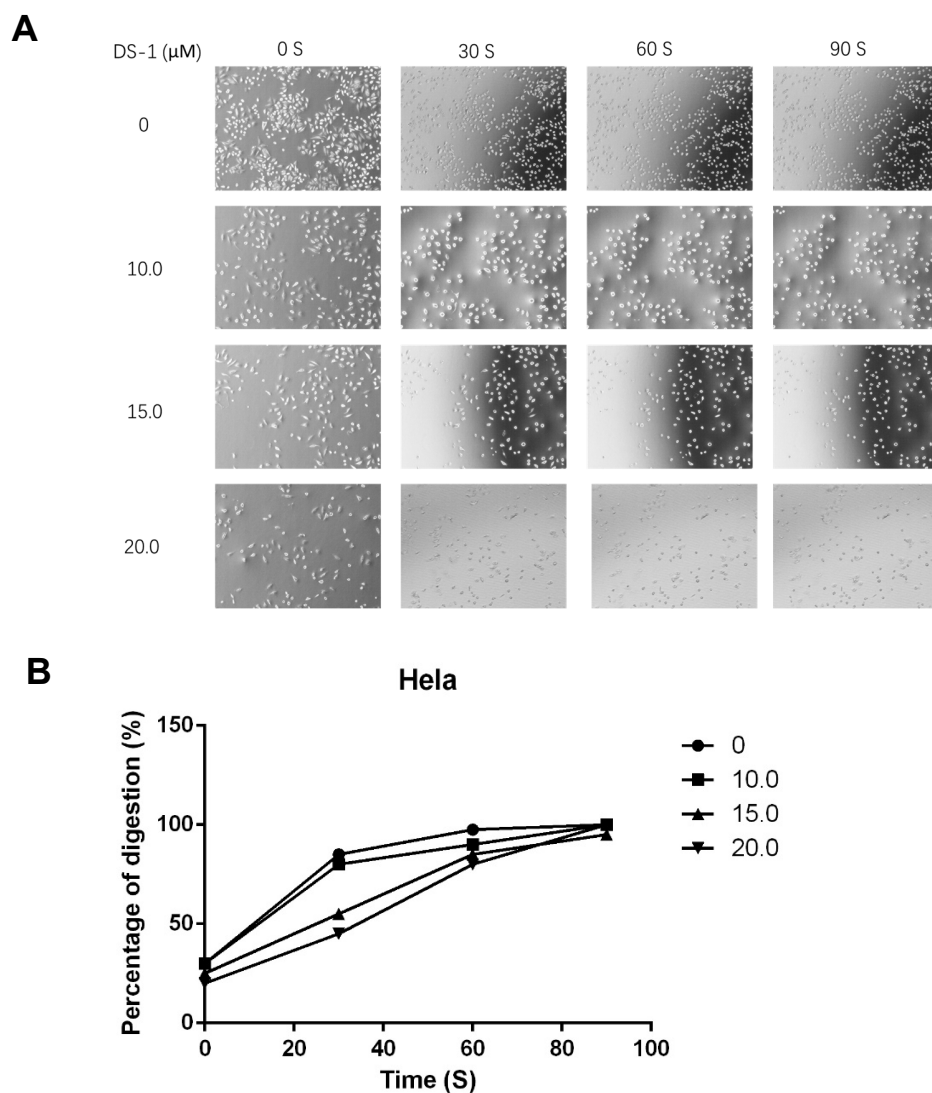

**Figure S2.** The effects of DS-1 on HeLa cell adhesion on cell culture plates against trypsin digestion. (A) HeLa cells were seeded at 80000 per well in 6-well plates for 12 h, then treated with 0, 10.0, 15.0, 20.0  $\mu\text{M}$  DS-1 for 24 h. After that, cells were washed by PBS solution and digested by 400  $\mu\text{L}$  0.25% trypsin. During the digestion, cellular morphology was recorded by inverted microscope with camera every 30 seconds. The digestion time was shown in Figure (B).

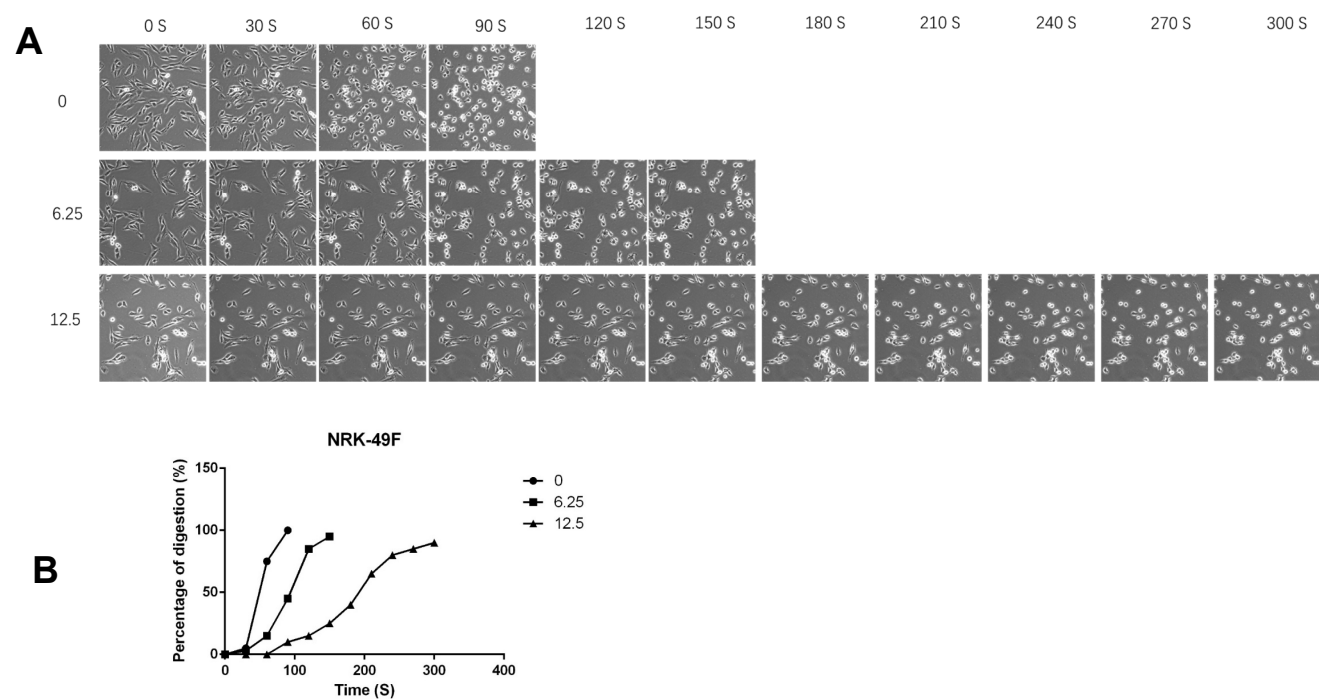

**Figure S3.** The effects of DS-1 on NRK-49F cell adhesion on cell culture plates against trypsin digestion. **(A)** NRK-49F cells were seeded at 80000 per well in 6-well plate for 12 h, then treated with 0, 6.25, 12.5  $\mu$ M DS-1 for 24 h. After that, cells were washed by PBS solution and digested by 400  $\mu$ L 0.25% trypsin. During the digestion, cellular morphology was recorded by inverted microscope every 30 seconds. The digestion time was shown in Figure **(B)**.

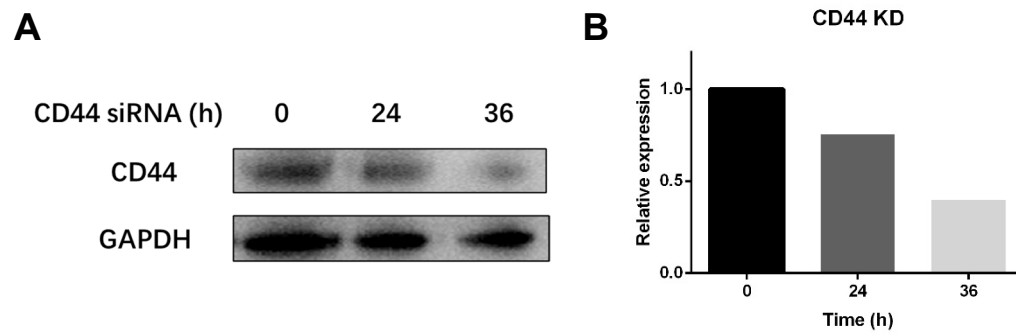

**Figure S4.** CD44 knockdown by siRNA. (A) U-2 OS cells were cultured in the 6-well plate, then CD44 was knocked down by siRNA for 24 h and 36 h. The relative expression of CD44 was detected by Western Blot and shown in Figure (B).
